# Supplementary material
Source: HighWire-hosted journal article supplement (http://qualitysafety.bmj.com/highwire/filestream/161688/field_highwire_adjunct_files/2/bmjqs-2021-014329supp003_data_supplement.pdf)
Supplement: bmjqs-2021-014329supp003_data_supplement.pdf [file bmjqs-2021-014329supp003_data_supplement.pdf]

## Consent form

This consent form has been used in an online format for the following groups of participants:

- healthcare professionals
- managers and system-level stakeholders
- women/service-users
- birth partners

### Project title

Coproducing good practice for remote antenatal care in response to the COVID-19 outbreak (the CORONET study)

### Ethical approval

HRA and Health and Care Research Wales (HCRW) Approval, REC reference 20/WM/0204

### Consent

|   |                                                                                                                                                                                                                                                                                                |        |
|---|------------------------------------------------------------------------------------------------------------------------------------------------------------------------------------------------------------------------------------------------------------------------------------------------|--------|
| 1 | I confirm that I have read the participant information sheet for this study.                                                                                                                                                                                                                   | Yes/No |
| 2 | I understand that taking part is voluntary and that I am free to withdraw at any time without giving any reason, and without my legal rights being affected.                                                                                                                                   | Yes/No |
| 3 | I understand that data collected from me will be anonymised and this anonymised data may be accessed by the funder (THIS Institute), the research sponsor (the University of Cambridge), or from regulatory authorities for the purpose of monitoring and audit only.                          | Yes/No |
| 4 | I agree that that anonymised data collected from me, including anonymised quotations, may be used in reports and publications arising from the study.                                                                                                                                          | Yes/No |
| 5 | I understand that if I agree, the anonymised data collected from me may be used to support other research in the future, and may be shared anonymously with other researchers working in THIS Institute or in other organisations.                                                             | Yes/No |
| 6 | I understand that some of the information I provide might be considered as health data or other data that would be classed as Special Category data under Article 9 of the General Data Protection Regulation (GDPR). I consent to the use of this information for the purposes of this study. | Yes/No |
| 7 | I agree to take part in the study.                                                                                                                                                                                                                                                             | Yes/No |

Note: if you tick 'no' to the following consent point you **will** still be able to take part in the study

|   |                                                                                                                                                     |        |
|---|-----------------------------------------------------------------------------------------------------------------------------------------------------|--------|
| 8 | I would like to receive a copy of the report from this study and agree to your retaining my email address in order to send me a copy of the report. | Yes/No |
|---|-----------------------------------------------------------------------------------------------------------------------------------------------------|--------|
